# Supplementary material
Source: PubMed Central journal article supplement (PMC1413887)
Supplement: pnas_0508783103_5.pdf [file pnas_0508783103_5.pdf]

## Materials

Amino acids, amino acid derivatives, and resins were from Novabiochem. Gel filtration chromatography was performed with Sephadex G-50 resin from Sigma.

## Instrumentation

Analytical HPLC was performed with an Agilent C8 column or a Varian Dynamax C18 column with linear gradients. Mass spectrometry was performed with an Applied Biosystems Voyager DE-Pro MALDI-TOF mass spectrometer with sinapinic acid (Fluka) as the matrix at the University of Wisconsin Biophysics Instrumentation Facility ([www.biochem.wisc.edu/bif](http://www.biochem.wisc.edu/bif)). Ultraviolet/visible spectra were recorded with either a Cary 50 Bio or a Cary 3 spectrometer.

## Strand and Fragment Synthesis

**Synthesis of (Pro-Pro-Gly)<sub>8</sub>-Cys(StBu)-Gly, Pro- $\alpha$ 1(StBu).** Fluorenylmethoxycarbonyl (Fmoc)-ProProGly-OH was synthesized as described (1). Pro- $\alpha$ 1-*tert*-butylthio (StBu) was then synthesized on Fmoc-Gly-polyethyleneglycol-polystyrene copolymer (PEG-PS) resin (Applied Biosystems): 1  $\times$  Fmoc-Cys(StBu)-OH, 8  $\times$  Fmoc-ProProGly-OH, cleaved from the resin with 95:2.5:2.5 trifluoroacetic acid (TFA)/H<sub>2</sub>O/isopropyl (iPr)<sub>3</sub>SiH (8 ml, 2 h) and precipitated from *tert*-butylmethyl ether: 58% yield; MS (MALDI-TOF) [M+H]<sup>+</sup> calculated for C<sub>105</sub>H<sub>155</sub>N<sub>26</sub>O<sub>27</sub>S<sub>2</sub> 2277.6, found 2277.6; HPLC *t*<sub>R</sub> 17.79 min [Agilent C8 column, 85:15–15:85 H<sub>2</sub>O/CH<sub>3</sub>CN containing TFA (0.1% vol/vol) over 50 min].

**Synthesis of (Pro-Hyp-Gly)<sub>8</sub>-Cys(StBu)-Gly, Hyp- $\alpha$ 1(StBu).** FmocProHypGly was synthesized as described (1), but with Hyp in the Yaa position (no *tert*-butyl protection was necessary). Hyp- $\alpha$ 1(StBu) was then synthesized on Fmoc-Gly-PEG-PS resin: 1  $\times$  Fmoc-Cys(StBu)-OH, 8  $\times$  Fmoc-ProHypGly-OH, cleaved from the resin with 95:2.5:2.5 TFA/H<sub>2</sub>O/iPr<sub>3</sub>SiH (8 ml, 2 h) and precipitated from *tert*-butylmethyl ether: 64% yield; MS (MALDI-TOF) [M+H]<sup>+</sup> calculated for C<sub>105</sub>H<sub>155</sub>N<sub>26</sub>O<sub>35</sub>S<sub>2</sub> 2405.6, found 2406.2; HPLC *t*<sub>R</sub> 14.89 min [Agilent C8 column, 85:15–15:85 H<sub>2</sub>O/CH<sub>3</sub>CN containing TFA (0.1% vol/vol) over 50

min]. The sample was heated at 80°C for 5 min prior to injection onto the column; otherwise a peak for folded trimers ( $t_R \sim 22$  min) was observed.

**Attachment of Fmoc-Gly-OH to 4-Hydroxymethylphenoxyacetyl-Polyethyleneglycol-Polyacrylamide Copolymer (HMPA-PEGA) Resin, Fmoc-Gly-PEGA.** HMPA-PEGA resin was obtained from Novabiochem already preswollen in MeOH with an approximate wet loading of 0.072 mmol/g. Preswollen HMPA-PEGA resin (1.545 g, 0.111 mmol) was washed with CH<sub>2</sub>Cl<sub>2</sub> (3 × 5 ml) and dried under high vacuum for 1 h to remove all MeOH. The resin was then swollen in *N,N*-dimethylformamide (DMF) for Fmoc-Gly-OH attachment.

In a flame-dried flask under Ar(g) atmosphere, Fmoc-Gly-OH (331 mg, 1.11 mmol) was dissolved in CH<sub>2</sub>Cl<sub>2</sub> (10 ml) and DMF (0.5 ml). The clear solution was cooled to 0°C, diisopropylcarbodiimide (87 ml, 0.56 mmol) was added, and the mixture was stirred at 0°C for 30 min to generate the symmetrical anhydride. The solution was concentrated to remove CH<sub>2</sub>Cl<sub>2</sub>, DMF (3 ml) was added, and the anhydride solution was filtered through cotton (to remove the insoluble urea) into the swelled resin suspension. A solution of dimethylaminopyridine (1.4 mg, 0.11 mmol) in DMF (0.1 ml) was added, the vessel was purged with Ar(g), and the suspension was agitated gently for 1.5 h. The resin was then drained, washed with DMF (7 × 10 ml) and CH<sub>2</sub>Cl<sub>2</sub> (7 × 10 ml), and dried under high vacuum to give Fmoc-Gly-PEGA. Resin-loading was measured by ultraviolet spectroscopy to be 0.25 mmol/g.

**Synthesis of (Pro-Pro-Gly)<sub>3</sub>-Gly-Cys(Acm)-Cys(StBu)-Gly-(Pro-Pro-Gly)<sub>5</sub>-(HMPA-PEGA), Pro- $\alpha$ 2(Acm,StBu)-PEGA.** Pro- $\alpha$ 2(Acm,StBu)-PEGA (Acm = acetamidomethyl) was synthesized by starting with Fmoc-Gly-(HMPA-PEGA) resin (0.33 g, 80  $\mu$ mol): 2 × Fmoc-Pro-OH, 4 × Fmoc-ProProGly-OH, 1 × Fmoc-Gly-OH, 1 × Fmoc-Cys(StBu)-OH, 1 × Fmoc-Cys(Acm)-OH, 1 × Fmoc-Gly-OH, 3 × Fmoc-ProProGly-OH. A small amount of peptide was cleaved from the resin with 95:2.5:2.5 TFA/H<sub>2</sub>O/*i*Pr<sub>3</sub>SiH for analysis: MS (MALDI-TOF) [M+H]<sup>+</sup> calculated for C<sub>113</sub>H<sub>168</sub>N<sub>29</sub>O<sub>30</sub>S<sub>3</sub> 2507.2, found 2508.0.

**Synthesis of (Pro-Hyp-Gly)<sub>3</sub>-Gly-Cys(Acm)-Cys(StBu)-Gly-(Pro-Hyp-Gly)<sub>5</sub>-(HMPA-PEGA), Hyp- $\alpha$ 2(Acm,StBu)-PEGA.** Hyp- $\alpha$ 2(Acm,StBu)-PEGA was synthesized by starting with Fmoc-Gly-(HMPA-PEGA) resin (0.25 g, 61  $\mu$ mol): 1 × Fmoc-Hyp(tBu)-OH, 1 × Fmoc-

Pro-OH, 4 × Fmoc-ProHypGly-OH, 1 × Fmoc-Gly-OH, 1 × Fmoc-Cys(StBu)-OH, 1 × Fmoc-Cys(Acm)-OH, 1 × Fmoc-Gly-OH, 3 × Fmoc-ProHypGly-OH. A small amount of peptide was cleaved from the resin with 95:2.5:2.5 TFA/H<sub>2</sub>O/iPr<sub>3</sub>SiH for analysis: MS (MALDI-TOF) [M+H]<sup>+</sup> calculated for C<sub>113</sub>H<sub>168</sub>N<sub>29</sub>O<sub>38</sub>S<sub>3</sub> 2635.1, found 2635.6.

### Disulfide Bond Formation

**Pro-α2(*p*-Npys,Acm)-PEGA.** Pro-α2(Acm,StBu)-PEGA (7.7 μmol) was swollen in 95:5 TFE/H<sub>2</sub>O (1 ml, 5 min), Bu<sub>3</sub>P (38 μl, 150 μmol) was added, and the suspension was agitated gently for 2 h. The resin was drained, washed with trifluoroethanol (3 × 1 ml), DMF (8 × 1 ml) and CH<sub>2</sub>Cl<sub>2</sub> (8 × 1 ml), and dried under high vacuum for 30 min. The resin was then swollen in CH<sub>2</sub>Cl<sub>2</sub> (0.6 ml, 5 min). A solution of *p*-Npys<sub>2</sub> (2,2'-dithiobis(5-nitropyridine), 24 mg, 77 μmol) in CH<sub>2</sub>Cl<sub>2</sub> (0.4 ml) was added to the swelled resin, the vessel was purged with Ar(g) and the suspension was agitated gently for 2 h. The resin was drained, washed with CH<sub>2</sub>Cl<sub>2</sub> (3 × 1 ml), DMF (20 × 1 ml), and CH<sub>2</sub>Cl<sub>2</sub> (8 × 1 ml), and dried under high vacuum. A small amount of peptide was cleaved from the resin with 95:2.5:2.5 TFA/H<sub>2</sub>O/iPr<sub>3</sub>SiH for analysis: MS (MALDI-TOF) [M+H]<sup>+</sup> calculated for C<sub>114</sub>H<sub>162</sub>N<sub>31</sub>O<sub>32</sub>S<sub>3</sub> 2573.1, found 2573.6.

**Pro-α1.** A solution of Pro-α1(StBu) (28 mg, 12 μmol) and Bu<sub>3</sub>P (61 μl, 250 μmol) in 95:5 TFE/H<sub>2</sub>O (1 ml) was agitated gently for 2 h. The peptide was precipitated from *tert*-butylmethyl ether (15 ml) to give Pro-α1: MS (MALDI-TOF) [M+H]<sup>+</sup> calculated for C<sub>101</sub>H<sub>147</sub>N<sub>26</sub>O<sub>27</sub>S 2188.1, found 2188.8.

**Pro-α1α2(Acm)-PEGA.** Pro-α2(Acm,*p*-Npys)-PEGA (7.7 μmol) was swollen in buffer (0.4 ml, 5 min). A solution of Pro-α1 (12 μmol) in buffer (1 ml) was added to the swelled resin, the vessel was purged with Ar(g), and the suspension was agitated gently for 12 h [buffer: 50 mM NH<sub>4</sub>OAc, 2 mM EDTA, pH 5.4, degassed and sparged with Ar(g)]. The resin was drained, washed with H<sub>2</sub>O (7 × 1 ml), DMF (7 × 1 ml), and CH<sub>2</sub>Cl<sub>2</sub> (7 × 1 ml), and dried under high vacuum. A small amount of peptide was cleaved from the resin with 95:2.5:2.5 TFA/H<sub>2</sub>O/iPr<sub>3</sub>SiH for analysis: MS (MALDI-TOF) [M+H]<sup>+</sup> (average) calculated for C<sub>210</sub>H<sub>304</sub>N<sub>55</sub>O<sub>57</sub>S<sub>3</sub> 4607.2, found 4607.9.

**Pro- $\alpha$ 1 $\alpha$ 2(*o*-Npys)-PEGA.** Pro- $\alpha$ 1 $\alpha$ 2(Acm)-PEGA was swollen in DMF (0.4 ml, 5 min), a solution of *o*-Npys-Cl (3-nitro-2-pyridinesulfonyl chloride, 2.9 mg, 15  $\mu$ mol) in DMF (0.6 ml) was added to the swelled resin, and the suspension was agitated gently for 2 h. The resin was drained, washed with DMF (8  $\times$  1 ml) and CH<sub>2</sub>Cl<sub>2</sub> (8  $\times$  1 ml) and dried under high vacuum. A small amount of peptide was cleaved from the resin with 95:2.5:2.5 TFA/H<sub>2</sub>O/*i*Pr<sub>3</sub>SiH for analysis: MS (MALDI-TOF) [M+H]<sup>+</sup> (average) calculated for C<sub>212</sub>H<sub>301</sub>N<sub>56</sub>O<sub>58</sub>S<sub>4</sub> 4690.2, found 4688.9.

**Fragment 1 (Pro- $\alpha$ 1 $\alpha$ 2 $\alpha$ 1').** Pro- $\alpha$ 1 $\alpha$ 2(*o*-Npys)-PEGA (7.7  $\mu$ mol) was swollen in buffer (0.4 ml, 5 min). A solution of Pro- $\alpha$ 1 (12  $\mu$ mol) in buffer (1 ml) was added to the swelled resin, the vessel was purged with Ar(g), and the suspension was agitated gently for 12 h [buffer: 50 mM NH<sub>4</sub>OAc, 2 mM EDTA, pH 5.4, degassed and sparged with Ar(g)]. The resin was drained, washed with H<sub>2</sub>O (7  $\times$  1 ml), DMF (7  $\times$  1 ml), and CH<sub>2</sub>Cl<sub>2</sub> (7  $\times$  1 ml), and dried under high vacuum. The fragment was then cleaved from the resin with 95:2.5:2.5 TFA/H<sub>2</sub>O/*i*Pr<sub>3</sub>SiH (8 ml, 2 h) and precipitated from *tert*-butylmethyl. Crude **1** was dissolved in 20 mM NH<sub>4</sub>CO<sub>3</sub> (pH 6.0, 1 ml), introduced onto a Sephadex G-50 column (21 cm  $\times$  2.5 cm) and eluted with the same 20 mM NH<sub>4</sub>CO<sub>3</sub> buffer to give **1** (6.4 mg, 12% overall): MS (MALDI-TOF) [M+H]<sup>+</sup> (average) calculated for C<sub>308</sub>H<sub>443</sub>N<sub>80</sub>O<sub>83</sub>S<sub>4</sub> 6722.6, found 6723.3; HPLC *t*<sub>R</sub> 18.75 min [Aligent C8 column, 90:10-10:90 H<sub>2</sub>O/CH<sub>3</sub>CN containing TFA (0.1% vol/vol) over 60 min].

**Hyp- $\alpha$ 2(*p*-Npys,Acm)-PEGA.** Hyp- $\alpha$ 2(*p*-Npys,Acm)-PEGA was prepared as described for Pro- $\alpha$ 2(*p*-Npys,Acm)-PEGA starting with Hyp- $\alpha$ 2(Acm,StBu)-PEGA (8.3  $\mu$ mol): MS (MALDI-TOF) [M+H]<sup>+</sup> calculated for C<sub>114</sub>H<sub>162</sub>N<sub>31</sub>O<sub>40</sub>S<sub>3</sub> 2701.1, found 2701.1.

**Hyp- $\alpha$ 1.** Hyp- $\alpha$ 1 was prepared as described for Pro- $\alpha$ 1 starting with Hyp- $\alpha$ 1(StBu) (32 mg, 13  $\mu$ mol): MS (MALDI-TOF) [M+H]<sup>+</sup> calculated for C<sub>101</sub>H<sub>147</sub>N<sub>26</sub>O<sub>35</sub>S 2316.0, found 2316.3.

**Hyp- $\alpha$ 1 $\alpha$ 2(Acm)-PEGA.** Hyp- $\alpha$ 1 $\alpha$ 2(Acm)-PEGA was prepared as described for Pro- $\alpha$ 1 $\alpha$ 2(Acm)-PEGA starting with Hyp- $\alpha$ 2(*p*-Npys, Acm)-PEGA (8.3  $\mu$ mol) and Hyp- $\alpha$ 1

(13  $\mu\text{mol}$ ): MS (MALDI-TOF)  $[\text{M}+\text{H}]^+$  (average) calculated for  $\text{C}_{210}\text{H}_{304}\text{N}_{55}\text{O}_{73}\text{S}_3$  4863.2, found 4864.6.

**Hyp- $\alpha 1\alpha 2(o\text{-Npys})\text{-PEGA}$ .** Hyp- $\alpha 1\alpha 2(o\text{-Npys})\text{-PEGA}$  was prepared as described for Pro- $\alpha 1\alpha 2(o\text{-Npys})\text{-PEGA}$  starting with Hyp- $\alpha 1\alpha 2(\text{Acm})\text{-PEGA}$  (8.3  $\mu\text{mol}$ ): MS (MALDI-TOF)  $[\text{M}+\text{H}]^+$  (average) calculated for  $\text{C}_{212}\text{H}_{301}\text{N}_{56}\text{O}_{74}\text{S}_4$  4946.2, found 4948.6.

**Fragment 2 (Hyp- $\alpha 1\alpha 2\alpha 1'$ ).** Fragment **2** was prepared and purified as described for fragment **1**, starting with Hyp- $\alpha 1\alpha 2(o\text{-Npys})\text{-PEGA}$  (8.3  $\mu\text{mol}$ ) and Hyp- $\alpha 1$  (13  $\mu\text{mol}$ ) to give **2** (16.5 mg, 28% overall): MS (MALDI-TOF)  $[\text{M}+\text{H}]^+$  (average) calculated for  $\text{C}_{308}\text{H}_{443}\text{N}_{80}\text{O}_{107}\text{S}_4$  7106.5, found 7109.0; HPLC  $t_{\text{R}}$  13.88 min [Aligent C8 column, 90:10-10:90  $\text{H}_2\text{O}/\text{CH}_3\text{CN}$  containing TFA (0.1% vol/vol) over 60 min].

### Estimation of Assembly Length from $R_{\text{h}}$

The lengths of assemblies (**1**)<sub>n</sub> and (**2**)<sub>n</sub> were estimated from the  $R_{\text{h}}$  values measured with DLS by using the Broersma relations (Eq. 1) (2-4) and Tirado and Garcia de la Torre relations (Eq. 2) (5, 6), as described for collagen (7).

Broersma (2-4) relations:

$$0 = 2R_{\text{h}}[\delta - (1/2)(\gamma_{\parallel} + \gamma_{\perp})] - L \quad [1]$$

$$\delta = \ln(2L/d)$$

$$\gamma_{\parallel} = 0.807 + 0.15/\delta + 13.5/\delta^2 - 37/\delta^3 + 22/\delta^4$$

$$\gamma_{\perp} = -0.193 + 0.15/\delta + 8.1/\delta^2 - 18/\delta^3 + 9/\delta^4.$$

Tirado and Garcia de la Torre (5, 6) relations:

$$0 = 2R_{\text{h}}[(\ln(p) + \nu)] - L \quad [2]$$

$$p = L/d$$

$$\nu = 0.312 + 0.565p^{-1} - 0.1000p^{-2}.$$

In Eqs. **1** and **2**,  $L$  is the rod length and  $d$  is the rod diameter. After assuming that  $d = 1.36$  nm for collagen (8, 9), Eqs. **1** and **2** were solved for  $L$  with the FINDROOTS algorithm of IGOR PRO (Wavemetrics).

## References

1. Jenkins, C. L., Vasbinder, M. M., Miller, S. J. & Raines, R. T. (2005) *Org. Lett.* **7**, 2619–2622.
2. Broersma, S. (1960) *J. Chem. Phys.* **32**, 1626–1631.
3. Broersma, S. (1960) *J. Chem. Phys.* **32**, 1632–1635.
4. Broersma, S. (1981) *J. Chem. Phys.* **74**, 6989–6990.
5. Tirado, M. M. & Garcia de la Torre, J. (1979) *J. Chem. Phys.* **71**, 2581–2587.
6. Tirado, M. M. & Garcia de la Torre, J. (1980) *J. Chem. Phys.* **73**, 1986–1993.
7. Claire, K. & Pecora, R. (1997) *J. Phys. Chem. B* **101**, 746–753.
8. Boedtker, H. & Doty, P. (1956) *J. Am. Chem. Soc.* **78**, 4267–4280.
9. Boudko, S., Frank, S., Kammerer, R. A., Stetefeld, J., Schulthess, T., Landwehr, R., Lustig, A., Bächinger, H. P. & Engel, J. (2002) *J. Mol. Biol.* **317**, 459–470.
