# Supplementary material
Source: PubMed Central journal article supplement (PMC1413887)

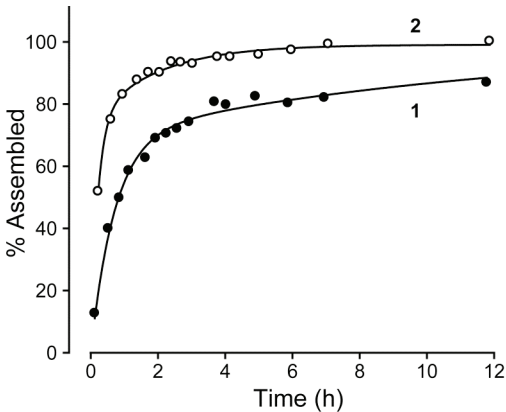

Supplement: pnas_0508783103_1.pdf [file pnas_0508783103_1.pdf]

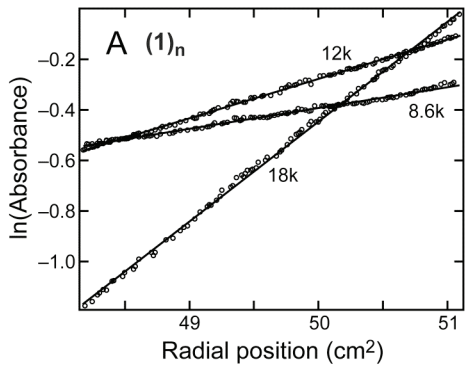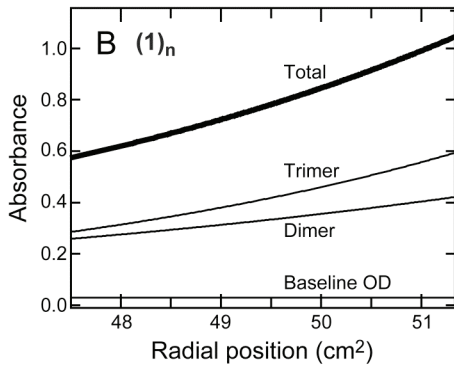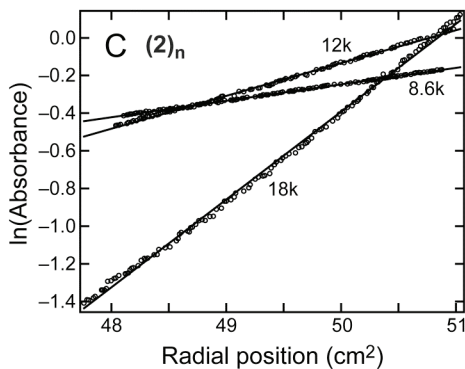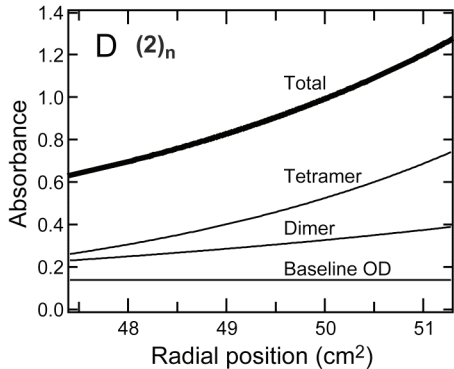

Supplement: pnas_0508783103_2.pdf [file pnas_0508783103_2.pdf]

A

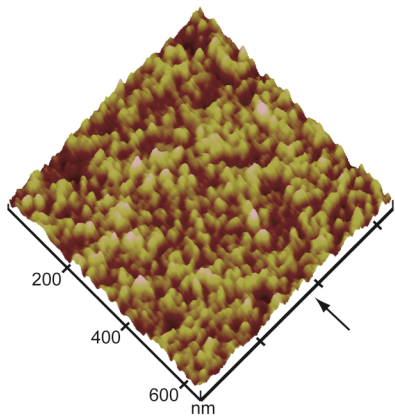

B

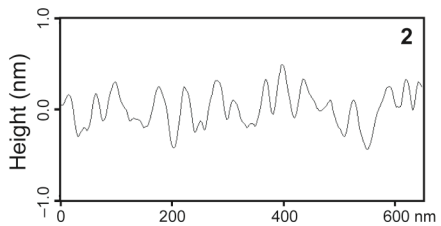

C

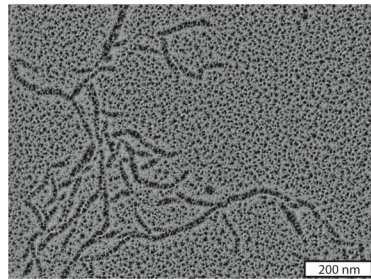

Supplement: pnas_0508783103_3.pdf [file pnas_0508783103_3.pdf]

**A**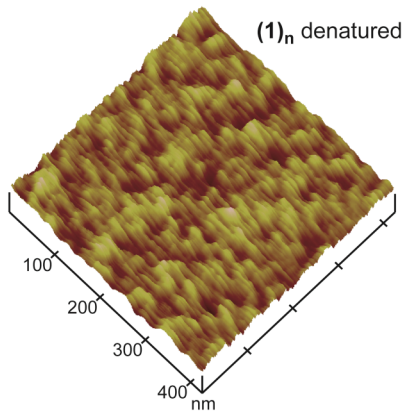**B**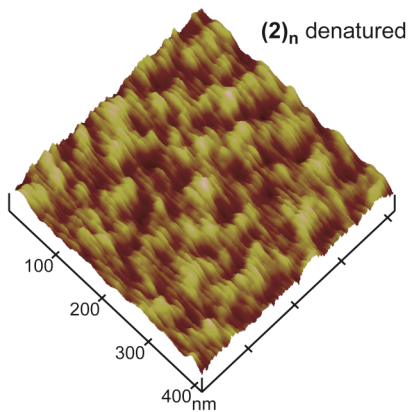**C**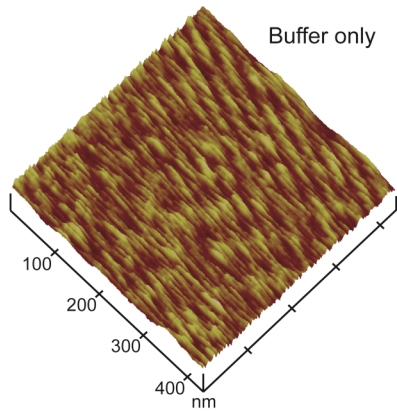

Supplement: pnas_0508783103_4.pdf [file pnas_0508783103_4.pdf]
